# Supplementary material for: A meta-analysis of alcohol consumption and thyroid cancer risk
Source: PubMed Central journal article supplement (PMC5342461; doi:10.18632/oncotarget.10352), 2016-06-30
Supplement: oncotarget-07-55912-s001.pdf [file oncotarget-07-55912-s001.pdf]

## A meta-analysis of alcohol consumption and thyroid cancer risk

### Supplementary Material

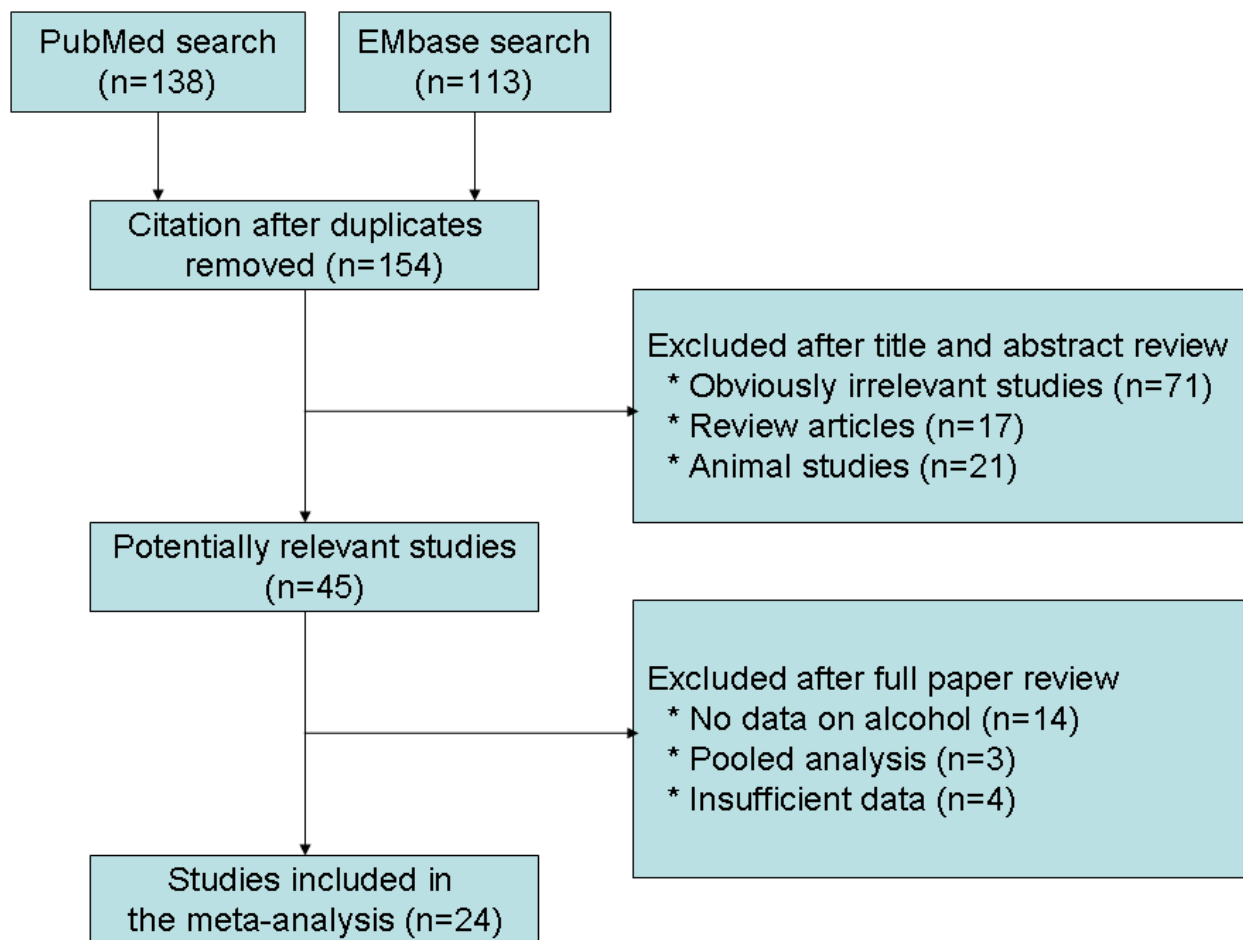

Figure S1. Flowchart for search and selection of studies for inclusion in this meta-analysis.

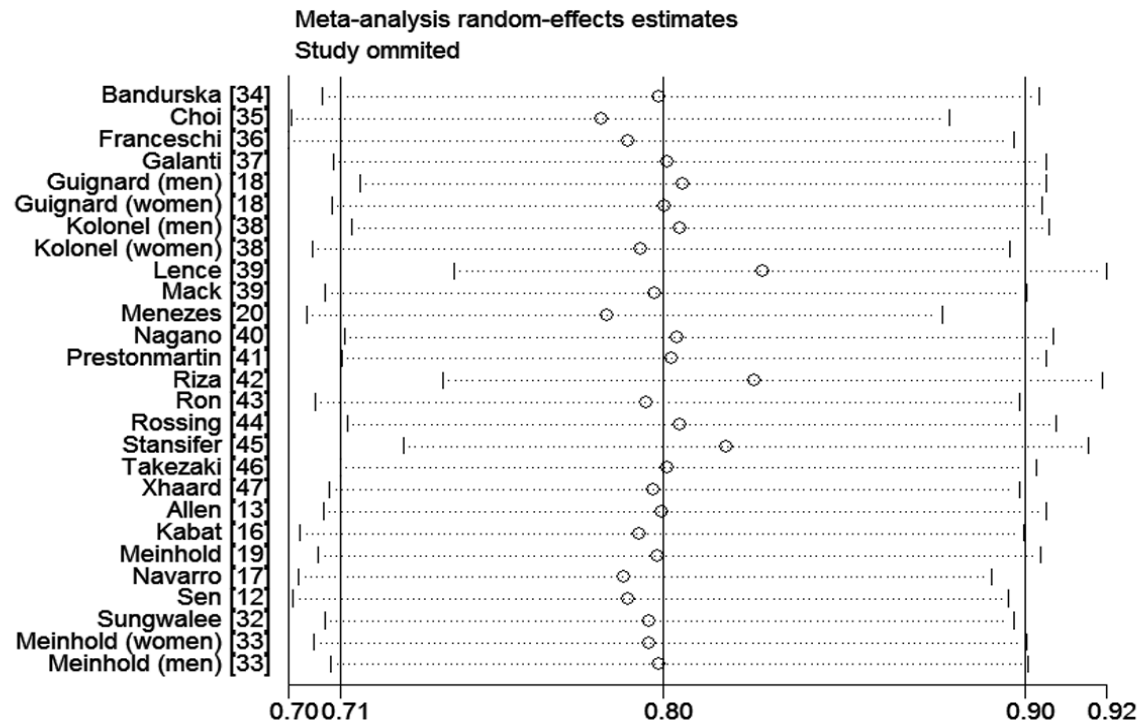

Figure S2. Sensitivity analysis by sequential removing a specific study.

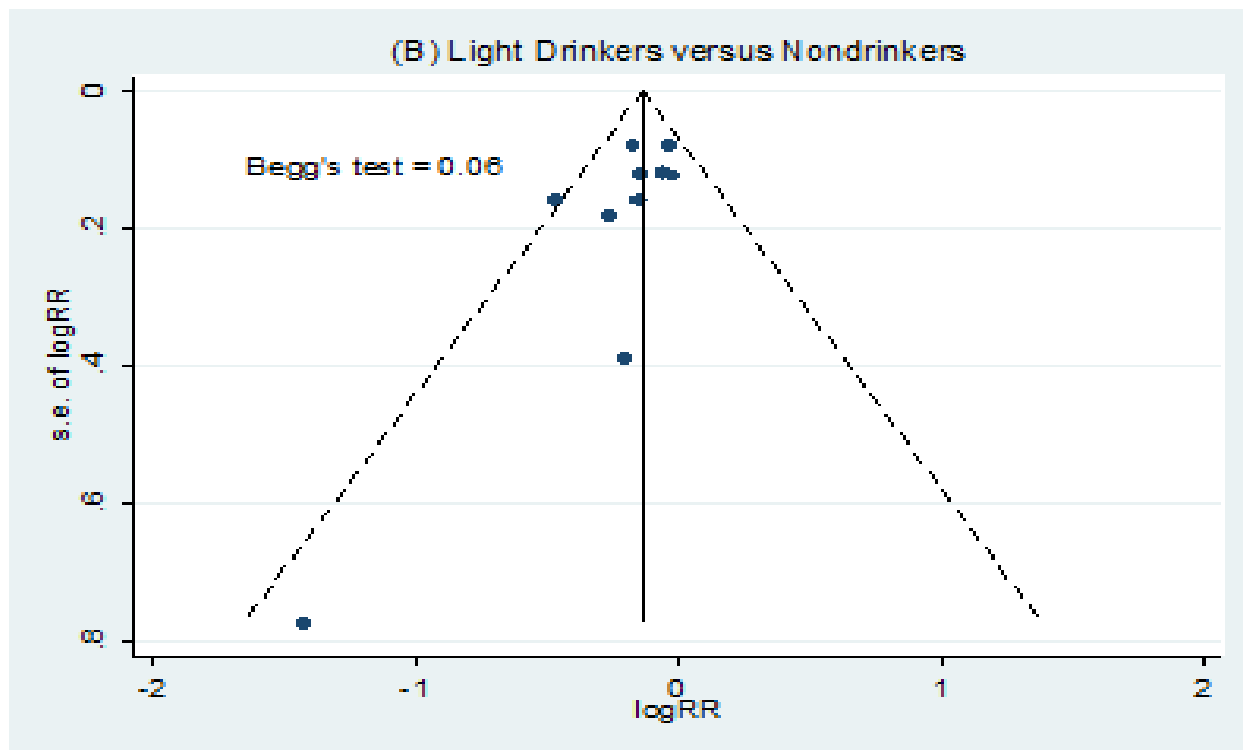

Figure S3. Publication bias by funnel plot of log relative risk (RR) versus corresponding standard error and the Begg's test.

**Supplementary Table S1**

**Table S1. Newcastle-Ottawa Quality Assessment Scale for Studies Included in the Meta-analysis**

**Table S1A. Methodologic quality of cohort studies included in the meta-analysis**

| Author and year of publication | Selection                                |                                     |                           |                 | Comparability | Outcome               |                     |                                 | Total quality Scores (★) |
|--------------------------------|------------------------------------------|-------------------------------------|---------------------------|-----------------|---------------|-----------------------|---------------------|---------------------------------|--------------------------|
|                                | Representativeness of the exposed cohort | Selection of the non-exposed cohort | Ascertainment of exposure | Incident events |               | Assessment of outcome | Length of follow-up | Adequacy of follow-up of cohort |                          |
| Sungwalee 2013 [32]            | A                                        | A                                   | C                         | A               | A             | A                     | A                   | A                               | 7                        |
| Sen 2015 [12]                  | A                                        | A                                   | C                         | A               | AB            | B                     | A                   | A                               | 8                        |
| Navarro 2005 [17]              | A                                        | A                                   | C                         | A               | AB            | B                     | A                   | A                               | 8                        |
| Meinhold 2009 [14]             | A                                        | A                                   | C                         | A               | AB            | A                     | B                   | A                               | 7                        |
| Kabat 2012 [16]                | A                                        | A                                   | C                         | A               | AB            | A                     | A                   | A                               | 8                        |
| Allen 2009 [13]                | A                                        | A                                   | C                         | A               | AB            | B                     | B                   | A                               | 7                        |
| Meinhold 2010 [33]             | A                                        | A                                   | C                         | A               | AB            | A                     | A                   | A                               | 8                        |

**Selection:** (1) **Representativeness of the exposed cohort:** A, truly representative of the average patient with thyroid cancer ★; B, somewhat representative of the average patient with thyroid cancer ★; C, selected group; and D, no description of the derivation of the cohort. (2) **Selection of the non-exposed cohort:** A, drawn from the same community as the exposed cohort ★; B, drawn from a different source; and C, no description of the derivation of the non-exposed cohort. (3) **Ascertainment of exposure:** A, secure record ★; B, interviewer-administered questionnaire ★; C, self-administered questionnaire; and D, no description. (4) **Demonstration that outcome of interest was not present at start of study:** A, yes ★; B, no.

**Comparability:** (5) **Comparability of cohorts on the basis of the design or analysis:** A, study controls for age, gender ★; B, study controls for additional risk factors (drinking, BMI, diabetes, et al)★.

**Outcome:** (6) **Assessment of outcome:** A, confirmed by medical records, ★; B, identified through ICD codes on database records ★; C, self-report; and D, no description. (7) **Was follow-up long enough for outcomes to occur: (mean of follow-up time more than 10 year)** A, yes ★; B, no; C, no statement. (8) **Adequacy of follow-up of cohorts:** A, complete follow-up all subjects accounted for ★; B, subjects lost to follow-up unlikely to introduce bias (small number lost), follow-up rate higher than 90%,or description provided of those lost ★; C, follow-up rate 90% or lower and no description of those lost; and D, no statement.

**Table S1B. Methodologic quality of case-control studies included in the meta-analysis**

| Authors and year of publication | Selection                    |                             |                       |                        | Comparability | Exposure                  |                                                     |                   | Total quality Scores (★) |
|---------------------------------|------------------------------|-----------------------------|-----------------------|------------------------|---------------|---------------------------|-----------------------------------------------------|-------------------|--------------------------|
|                                 | Adequate definition of cases | Representativeness of cases | Selection of controls | Definition of controls |               | Ascertainment of exposure | Same method of ascertainment for cases and controls | Non-response rate |                          |
| Bandurska 2011 [34]             | B                            | A                           | A                     | A                      | A             | C                         | A                                                   | B                 | 5                        |
| Choi 2013 [35]                  | B                            | A                           | A                     | A                      | AB            | B                         | A                                                   | A                 | 8                        |
| Franceschi 1989 [36]            | A                            | A                           | B                     | A                      | A             | C                         | A                                                   | B                 | 5                        |
| Galanti 1997 [37]               | A                            | A                           | A                     | A                      | A             | C                         | A                                                   | B                 | 6                        |
| Guignard 2007 [18]              | A                            | A                           | A                     | A                      | AB            | B                         | A                                                   | A                 | 9                        |
| Kolonel 1990 [38]               | A                            | A                           | A                     | A                      | AB            | B                         | A                                                   | A                 | 9                        |
| Lence-Anta 2014 [39]            | B                            | A                           | A                     | A                      | AB            | B                         | A                                                   | A                 | 8                        |
| Mack 2002 [19]                  | B                            | A                           | A                     | A                      | AB            | B                         | A                                                   | A                 | 8                        |
| Menezes 2015 [20]               | B                            | A                           | B                     | A                      | AB            | C                         | A                                                   | B                 | 5                        |
| Nagano 2007 [40]                | A                            | A                           | A                     | A                      | AB            | B                         | A                                                   | A                 | 9                        |
| Prestonmartin 1987 [41]         | B                            | A                           | A                     | A                      | A             | B                         | A                                                   | A                 | 8                        |
| Riza 2015 [42]                  | A                            | A                           | B                     | A                      | A             | B                         | A                                                   | B                 | 6                        |
| Ron 1987 [43]                   | A                            | A                           | A                     | A                      | AB            | B                         | A                                                   | A                 | 9                        |
| Rossing 2000 [44]               | B                            | A                           | A                     | A                      | AB            | B                         | A                                                   | C                 | 7                        |

|                   |           |   |   |   |   |    |   |   |   |   |
|-------------------|-----------|---|---|---|---|----|---|---|---|---|
| Stansifer<br>[45] | 2015      | A | A | A | A | AB | C | A | B | 7 |
| Takezaki<br>[46]  | 1996      | A | A | B | A | AB | C | A | B | 6 |
| Xhaard            | 2014 [47] | A | A | A | A | AB | B | A | B | 8 |

**Selection:** (1) **Is the case definition adequate?** A, yes, reference to medical/hospital records ★; B, yes, record linkage (e.g. ICD codes in database) or self-report; C, no description. (2) **Representativeness of the cases.** A, consecutive or obviously representative series of cases ★; B, potential for selection biases or not stated. (3) **Selection of Controls.** A, community controls ★; B, hospital controls; C no description. (4) **Definition of Controls.** A, no history of disease ★; B, no description of history of disease.

**Comparability:** (5) **Comparability of cases and controls on the basis of the design or analysis.** A, study controls for age, gender ★; B, study controls for any additional factor ((drinking, BMI, diabetes, et al)) ★.

**Exposure:** (6) **Ascertainment of exposure.** A, secure record ★; B, interviewer-administered questionnaire ★; C, self-administered questionnaire; and D, no description. (7) **Same method of ascertainment for cases and controls.** A, yes ★; B, no. (8) **Non-Response rate.** A, same rate for both groups ★; B, non respondents described; C, rate different and no designation
